# Supplementary material
Source: PubMed Central journal article supplement (PMC168932)
Supplement: nar_31_13_3540__1.pdf [file nar_31_13_3540__1.pdf]

## **SUPPLEMENTARY MATERIALS:**

### **PromH: Promoters Identification Using Orthologous Genomic Sequences V.V.Solovyev<sup>1</sup>, I.A.Shahmuradov<sup>2\*</sup>**

<sup>1</sup> Softberry Inc., 116 Radio Circle, Suite 400, Mount Kisco, NY, 10549, USA; Email: [victor@softberry.com](mailto:victor@softberry.com)

<sup>2</sup> Institute of Botany, Azerbaijan National Academy of Sciences, 370073, Baku, Azerbaijan.

\* **Present address:** Royal Holloway, University of London, Egham, Surrey, TW20 0EX, UK; E-mail: [ilham@cs.rhul.ac.uk](mailto:ilham@cs.rhul.ac.uk)

**Table s1. Predicted TSS for genes with annotated promoters: TATA or unknown type\***

| Abbreviated name of gene | Annotated start position of pre-mRNA <sup>1</sup>               | Annotated start position of CDS | Sequence source localization of analyzed 5'-region of gene | First positions of homology with ESTs <sup>2</sup> | Predicted TSS position              | Minimal distance <sup>3</sup> | LDF      | CONS (TSS) <sup>4</sup> % | CONS (TATA) <sup>5</sup> % | CONS-R <sup>6</sup> % | CONS (RES) <sup>7</sup> % | CONS (-100..+41) <sup>8</sup> % | CONS (total) <sup>9</sup> % |
|--------------------------|-----------------------------------------------------------------|---------------------------------|------------------------------------------------------------|----------------------------------------------------|-------------------------------------|-------------------------------|----------|---------------------------|----------------------------|-----------------------|---------------------------|---------------------------------|-----------------------------|
| <b>1</b>                 | <b>2</b>                                                        | <b>4</b>                        | <b>4</b>                                                   | <b>5</b>                                           | <b>6</b>                            | <b>7</b>                      | <b>8</b> | <b>9</b>                  | <b>10</b>                  | <b>11</b>             | <b>12</b>                 | <b>13</b>                       | <b>14</b>                   |
| <i>h-HBB</i>             | 62137 <sup>P</sup>                                              | 62187                           | 60137...62186 (-2000:+50) <sup>P</sup>                     | -23, -2, +1                                        | <b>62133, (-4)</b>                  | 4 (2)                         | 4.45     | 66                        | 100                        | 92                    | 82                        | 78                              | 47                          |
| <i>ol-HBB</i>            | ?                                                               | 51033                           | 49033...51032 (-2000:-1) <sup>c</sup>                      | -42, -34,                                          | <b>50981, (-10)</b>                 | ?                             | 4.09     | 77                        | 100                        | 92                    | 85                        | 78                              | 47                          |
| <i>h-HBD</i>             | 54740 <sup>P</sup>                                              | 54790                           | 52740...54789 (-2000:+50) <sup>P</sup>                     | +1, +22                                            | <b>54736, (-4)</b>                  | 4 (4)                         | 4.33     | 77                        | 81                         | 87                    | 80                        | 67                              | 30                          |
| <i>ol-HBD</i>            | ?                                                               | 46328                           | 44328...46327 (-2000:-1) <sup>c</sup>                      | -42, -34                                           | <b>46277, (-9)</b>                  | ?                             | 3.87     | 88                        | 81                         | 87                    | 51                        | 70                              | 30                          |
| <i>h-HBE</i>             | 19486 <sup>P</sup> ,<br>19289 <sup>P</sup> , 19488 <sup>P</sup> | 19541                           | 17289...19540 (-2000:+261) <sup>P</sup>                    | +1, +14, +16                                       | <b>19482, (+1, +6)<sup>10</sup></b> | 5 (5)                         | 4.07     | 88                        | 75                         | 71                    | 88                        | 79                              | 48                          |
| <i>ol-HBE</i>            | ?                                                               | 20461                           | 18461...20460 (-2000:-1) <sup>c</sup>                      | -193 <sup>H</sup> , -28 <sup>K</sup>               | <b>20406, (-27)</b>                 | ?                             | 3.43     | 66                        | 71                         | 75                    | 88                        | 79                              | 48                          |
| <i>h-HBGA</i>            | 39414 <sup>P</sup>                                              | ?                               | 37414...39913 (-2000:+500) <sup>P</sup>                    | -30, -3, -2, +1, 14                                | <b>39415, (+1)</b>                  | 0 (0)                         | 4.20     | 66                        | 71                         | 84                    | 81                        | 76                              | 48                          |
| <i>h-HBGG</i>            | 34478 <sup>P</sup>                                              | 34531                           | 32478...34530 (-2000:+52) <sup>P</sup>                     | -30, -6, -3, -2, +1, +3                            | <b>34478, (+1)</b>                  | 0 (0)                         | 4.16     | 66                        | 71                         | 82                    | 81                        | 53                              | 50                          |
| <i>ol-HBGG</i>           | ?                                                               | 28022                           | 26022...28021 (-2000:-1) <sup>c</sup>                      | ?                                                  | <b>27969 (-53)<sup>11</sup></b>     | ?                             | 3.26     | 66                        | 71                         | 82                    | 75                        | 75                              | 50                          |
| <i>h-MYL3</i>            | 1952 <sup>u</sup> ,<br>+1                                       | 2006                            | 1...2005 (-1951:+54) <sup>u</sup>                          | -12, +1, +4, +13, +15                              | <b>1947, (-5)</b>                   | 5 (5)                         | 3.77     | 100                       | 87                         | 56                    | 89                        | 74                              | 61                          |
| <i>r-MLC1V</i>           | 741 <sup>P</sup> ,<br>+1                                        | 808                             | 1...807 (-740:+67) <sup>P</sup>                            | +11, +34                                           | <b>744, (+4)</b>                    | 3                             | 2.94     | 41                        | 75                         | 66                    | 79                        | 82                              | 61                          |
| <i>h-MLC1emb</i>         | <2024 <sup>P</sup> ,<br>+1                                      | 2099                            | 25...2098 (-2000:+74) <sup>P</sup>                         | +14, +17                                           | <b>2023, (-1)</b>                   | 1                             | 3.13     | 66                        | 25                         | 50                    | 56                        | 43                              | 28                          |
| <i>m-MLC1F</i>           | 1624 <sup>P</sup> ,<br>+1                                       | 1749                            | 1...1748 (-1623:+125) <sup>c</sup>                         | -113, -101, +12, +13                               | <b>1624, (+1)</b>                   | 0                             | 2.55     | 25                        | 62                         | 40                    | 45                        | 43                              | 28                          |
| <i>h-MYF4</i>            | <1177 <sup>c</sup>                                              | 1177                            | 1...1176 (-1176:-1) <sup>c</sup>                           | -152, -24                                          | <b>1126, (-27)</b>                  | ?                             | 4.10     | 100                       | 100                        | 89                    | 90                        | 94                              | 43                          |
| <i>m-MYOG</i>            | 1570 <sup>m</sup> ,<br>+1                                       | 1619                            | 1...1618 (-1569:+49) <sup>m</sup>                          | +6, +10, +17                                       | <b>1568, (-2)</b>                   | 2 (27)                        | 4.05     | 100                       | 100                        | 89                    | 90                        | 94                              | 43                          |
| <i>h-PGAM-M</i>          | 921 <sup>P</sup> ,<br>+1                                        | 963                             | 1...962 (-920:+42) <sup>P</sup>                            | -10, -6, +5, +8, +10, +18,                         | <b>921, (+1)</b>                    | 0                             | 4.17     | 88                        | 81                         | 56                    | 71                        | 66                              | 40                          |
| <i>r-PGAM2</i>           | 1182 <sup>c</sup> ,                                             | 1182                            | 1...1181 (-1181:-1) <sup>c</sup>                           | -5, +2, +53                                        | <b>1148, (-1)</b>                   | 1 (from TATA)                 | 3.12     | 77                        | 81                         | 52                    | 82                        | 68                              | 40                          |

**Table s1 (continued)**

| 1              | 2                         | 4       | 4                                            | 5                | 6                                  | 7          | 8     | 9   | 10                | 11 | 12 | 13 | 14 |
|----------------|---------------------------|---------|----------------------------------------------|------------------|------------------------------------|------------|-------|-----|-------------------|----|----|----|----|
| <i>h-NPPA</i>  | >c(33843) <sup>c</sup>    | 33198/c | 33199...35843/c<br>(-2000:+645) <sup>p</sup> | +251, +313       | <b>34063,</b><br><b>(-&lt;220)</b> | ?          | 2.82  | 77  | 47                | 51 | 51 | 54 | 31 |
| <i>r-NPPA</i>  | 3638 <sup>p</sup> ,<br>+1 | 3723    | 1638..3722<br>(-2000.+85) <sup>c</sup>       | +46, +53         | <b>3637, (-1)</b>                  | 1          | 6.74  | 100 | 100               | 78 | 87 | 78 | 31 |
| <i>h-GLUT4</i> | 2033 <sup>m</sup> ,<br>+1 | 2225    | 33...2224<br>(-2000:+192) <sup>m</sup>       | ?                | <b>1928, (-105)</b>                | 105<br>(?) | 4.01  | 88  | 25                | 97 | 52 | 65 | 30 |
| <i>m-GLUT4</i> | 786 <sup>m</sup> ,<br>+1  | ?       | 1...955<br>(-785:+170) <sup>m</sup>          | +15, +17,<br>+57 | <b>740, (-46)</b>                  | 46         | 10.23 | 88  | TATA <sup>-</sup> | 57 | 86 | 71 | 30 |

<sup>a</sup> Promoter type for *r-MLC1V*, *h-MYF4*, *h-PGAM-M*, *h-NPPA*, *r-NPPA* and *hGLUT4* genes are not known. Other 15 genes were annotated to have TATA-promoters.

*h-HBB*, human beta-hemoglobin: gb AC U01317.1 (and references therein); *o1-HBB*, otolemur beta-hemoglobin: U60902; *h-HBD*, human delta-hemoglobin : U01317.1 (and references therein); *o1-HBD*, otolemur delta-hemoglobin: U60902; *h-HBE*, human epsilon-hemoglobin: U01317.1 (and references therein); *o1-HBE*, otolemur epsilon-hemoglobin: U60902; *h-HBG4*, human hemoglobin Gamma A: U01317.1 (and references therein); *h-HBG*, human hemoglobin Gamma-G: U01317.1 (and references therein); *o1-HBG*, otolemur hemoglobin gamma-G: U60902; *h-MYL3*, human ventricular myosin light chain gene: M76408 (s1); *r-MLC1V*, rat MLC1V gene encoding alkali myosin ventricle light chain: X16325; *h-MLC1emb*, human MLC1emb gene for embryonic myosin alkaline light chain: X58851, X55000 (s2); *m-MLC1F*, mouse MLC1F/MLC3F gene for myosin alkali light chain, exon 1: X12973 (s3); *h-MYF4*, human myogenin (MYF4) gene: AF050501; *m-MYOG*, mouse myogenin: M95800 (s4); *h-PGAM-M*, human phosphoglycerate mutase, PGAM-M, gene: J05073 (s5); *r-PGAM2*, rat gene phosphoglycerate mutase: NM\_017328; *h-NPPA*, human atrial natriuretic factor ANF precursor (atrial natriuretic peptide ANP /prepronatriuretic/isoform 2) gene : AL021155; *r-NPPA*, rat atrial natriuretic factor (ANF) gene: J03267; *h-GLUT4*, human glucose transporter, GLUT4, gene: M91463; *m-GLUT4*, mouse glucose transporter gene: M29660.

1 “?” means that no annotation is available. <sup>2</sup> Positions of ESTs corresponding to Alu or other repetitive sequences are not shown. <sup>3</sup> Minimal distance from annotated pre-mRNA/CDS or EST start; it is given if the corresponding distance from pre-mRNA start is not known and no other information is available.

<sup>4</sup> **CONS (TSS)**, interspecies conservation level around TSS (-3...TSS...+5). <sup>5</sup> **CONS (TATA)**, interspecies conservation level of TATA box (-2...TATA...+6). <sup>6</sup> Interspecies conservation level right to TSS (+1...+40). <sup>7</sup> **CONS (REs)**, average interspecies conservation level of regulatory motifs left to TSS. <sup>8</sup> **CONS (-100..+41)** : interspecies conservation level of the region -100..+41. <sup>9</sup> **CONS (total)**: full-length interspecies conservation level of analyzed orthologous sequences. These abbreviations are also used in the Table s3.

<sup>10</sup> For *h-HBE* gene, three alternative pre-mRNA start positions (19289, 19486, 19488) have been annotated, and the predicted TSS position is given relative to 19486 position. <sup>11</sup> Predicted TSS position is given relative to CDS start position (information about TSS or corresponding EST position is not available).

Hereafter localizations of analysed 5'-regions are given relative to pre-mRNA (<sup>p</sup>), mRNA (<sup>m</sup>), CDS (<sup>c</sup>) or UTR (<sup>u</sup>) start positions. For *H-HBE* gene, three alternative pre-mRNA start positions (19289, 19486, 19488) have been annotated, and we use 5'-region including all of them. “?” is unknown location.

**Table s2. Comparing TSS prediction results for 21 genes with promoters of TATA or unknown type by TSSW and PromH**

|                            | <i>o1-HBE</i> | <i>r-MLC1V</i> | <i>h-MYF4</i> | <i>m-MYOG</i> | <i>I-PGAM2</i> | <i>o1-HBGG</i>         | Total estimation of TSS predictions for 21 genes |                  |                  |
|----------------------------|---------------|----------------|---------------|---------------|----------------|------------------------|--------------------------------------------------|------------------|------------------|
|                            |               |                |               |               |                |                        | True (reasonable)                                | False – positive | False - negative |
| TSS predicted by TSSW      | not found     | not found      | -1066         | -862          | not found      | not found              | 15                                               | 3                | 6                |
| TSS predicted by PromoterH | <b>-10</b>    | <b>+4</b>      | <b>-27</b>    | <b>-2</b>     | <b>-1</b>      | <b>-53<sup>1</sup></b> | 21                                               | 0                | 0                |

Putative TSSs, predicted from -300 to +100 (in relation to the annotated TSS), but always before CDS start, are believed as true or reasonable predictions and are shown in bold.

<sup>1</sup>Predicted TSS position is given in relation to CDS start (TSS was not annotated).

**Table s3. Predicted TSSs for genes with annotated TATA-less promoters <sup>1</sup>**

| Abbreviated name of gene | Annotated start position of pre-mRNA | Annotated start position of CDS | Sequence source localization of analyzed 5'-region of gene | Predicted TSS position                 | Minimal distance               | LDF      | CONS (TSS) % | CONS-R, % | CONS (REs), % | CONS (-100..+41), % | CONS (total), % |
|--------------------------|--------------------------------------|---------------------------------|------------------------------------------------------------|----------------------------------------|--------------------------------|----------|--------------|-----------|---------------|---------------------|-----------------|
| <i>I</i>                 | <u>2</u>                             | <u>3</u>                        | <u>4</u>                                                   | <u>5</u>                               | <u>6</u>                       | <u>7</u> | <u>8</u>     | <u>9</u>  | <u>10</u>     | <u>11</u>           | <u>12</u>       |
| <i>h-NCX</i>             | <2170                                | 2170                            | 1...2172<br>(-2169:+3)                                     | 1817<br>(-353)<br>1256 <sup>TATA</sup> | ?<br>(353?) <sup>2</sup><br>45 | 13.13    | 100          | 87        | 81            | 76                  | 65              |
| <i>m-NCX</i>             | <u>1301</u>                          | 1599                            | 1...1600<br>(-1300:+300)                                   | (-45)                                  |                                | 4.71     | 88           | 71        | 78            | 62                  | 65              |
| <i>m-SURI</i>            | <u>1200</u>                          | 1346                            | 1...1380<br>(-1199:+281)                                   | 1261<br>(+61)                          | 61                             | 23.11    | 69           | 46        | 66            | 50                  | 33              |
| <i>h-RPE65</i>           | <u>1919</u>                          | 1973                            | 2001...4008<br>(-1918:+90)                                 | 1915 <sup>TATA</sup><br>(-4)           | 4                              | 3.92     | 88           | 80        | 68            | 72                  | 48              |
| <i>h-HHEY1</i>           | <u>2860</u>                          | 2999                            | 1001...4008<br>(-2859:+149)                                | 2663<br>(-197)                         | 197                            | 22.59    | 55           | 64        | 77            | 65                  | 45              |
| <i>m-HHEY1</i>           | <u>2841</u>                          | 2979                            | 1...2988<br>(-2840:+148)                                   | 2747<br>(-94)                          | 94                             | 20.51    | 77           | 53        | 72            | 62                  | 45              |
| <i>h-ABCD2</i>           | <3474-3513                           | <u>3684</u>                     | 3001...6686<br>(-3683:+3)                                  | 3504<br>(+1)                           | 0                              | 5.75     | 77           | 84        | 88            | 77                  | 36              |
| <i>m-ABCD2</i>           | <3192-3231                           | <u>3394</u>                     | 1001...3397<br>(-3393:+4)                                  | 3181<br>(-9)                           | 9                              | 8.15     | 83           | 69        | 91            | 77                  | 36              |
| <i>h-Nrr1</i>            | <u>1516</u>                          | 1867                            | 1...1620<br>(-1515:+105) <sup>3</sup>                      | 1339<br>(-111)                         | 111                            | 9.42     | 66           | 89        | 65            | 68                  | 34              |
| <i>h-SP4</i>             | 2572-2647                            | <u>2858</u>                     | 16061...19020<br>(-2858:+102) <sup>4</sup>                 | 2639<br>(+1)                           | 0                              | 22.29    | 100          | 100       | 86            | 84                  | 53              |
| <i>m-SP4</i>             | 2656-2731                            | <u>2942</u>                     | 1001...4020<br>(-2941:+79)                                 | 2685<br>(+1)                           | 0                              | 27.55    | 77           | 94        | 86            | 82                  | 53              |
| <i>h-B29</i>             | <u>998</u>                           | 1090                            | 1...1211<br>(-997:+214)                                    | 993<br>(+1)                            | 0                              | 5.67     | 88           | 69        | 84            | 81                  | 44              |
| <i>h-HEB</i>             | <u>847</u>                           | >847                            | 1...1303<br>(-1313:+214)                                   | 950<br>(+103)                          | 103                            | 7.92     | 88           | 59        | 65            | 63                  | 34              |
| <i>m-HEB</i>             | <u>1351</u>                          | >1350                           | 1...1586<br>(-1350:+236)                                   | 1271<br>(-80)                          | 80                             | 16.92    | 66           | 71        | 71            | 64                  | 34              |
| <i>h-PRNP</i>            | <u>1561</u>                          | >1560                           | 1001...2880<br>(-1560:+320)                                | 1632<br>(+71)                          | 71                             | 10.43    | 50           | 47        | 65            | 51                  | 40              |
| <i>m-PRNP</i>            | <u>1151</u>                          | >1150                           | 1...1440<br>(-1150:+290)                                   | 1141<br>(-10)                          | 10                             | 16.30    | 66           | 65        | 67            | 53                  | 40              |
| <i>h-HIC-1</i>           | 1479 (major),<br>1480-1500           | >1478                           | 1...1631<br>(-1478:+153)                                   | 1504 <sup>TATA</sup><br>(+4)           | 4                              | 4.68     | 100          | 94        | 91            | 93                  | 61              |
| <i>h-neu4</i>            | <u>1259<sup>6</sup></u>              | 1437 <sup>6</sup>               | 1...1446 <sup>7</sup><br>(-1258:+188)                      | 1258 <sup>TATA</sup><br>(-1)           | 1                              | 3.26     | 88           | 66        | 81            | 79                  | 67              |
| <i>r-neu4</i>            | 303,348,359,<br>363 (major)          | 506                             | 1...650<br>(-362:+288)                                     | 311<br>(+8)                            | 8                              | 7.99     | 100          | 83        | 71            | 76                  | 62              |
| <i>h-UTN</i>             | <u>897</u>                           | ?                               | 1...1200<br>(-896:+304)                                    | 823<br>(-74)                           | 74                             | 8.50     | 100          | 70        | 66            | 64                  | 63              |

**Table s3 (continued)**

| <i>I</i>          | <b>2</b>                      | <b>3</b>   | <b>4</b>                 | <b>5</b>        | <b>6</b> | <b>7</b> | <b>8</b> | <b>9</b> | <b>10</b> | <b>11</b> | <b>12</b> |
|-------------------|-------------------------------|------------|--------------------------|-----------------|----------|----------|----------|----------|-----------|-----------|-----------|
| <i>m-UTN</i>      | <u>839</u>                    | ?          | 1...1200<br>(-838:+362)  | 795<br>(-44)    | 44       | 4.71     | 66       | 76       | 81        | 65        | 63        |
| <i>h-KDR/fk1</i>  | <u>781</u>                    | 1084       | 1...1020<br>(-503:+37)   | 775<br>(-5)     | 5        | 24.32    | 55       | 68       | 57        | 60        | 60        |
| <i>m-KDR/fk1</i>  | <u>213<sup>7</sup></u>        | <u>504</u> | 1...540<br>(-503:+37)    | 207<br>(-6)     | 6        | 18.92    | 88       | 58       | 75        | 57        | 60        |
| <i>h-UROS(hp)</i> | <u>1558</u>                   | ?          | 1...1757<br>(-1557:+200) | 1675<br>(-1117) | 117      | 6.38     | 25       | 45       | 32        | 35        | 42        |
| <i>m-UROS(hp)</i> | <u>1773 (major)</u> ,<br>1834 | ?          | 1...2040<br>(-1772:+268) | 1523<br>(-250)  | 250      | 5.95     | 69       | 60       | 64        | 68        | 42        |
| <i>h-Smad7</i>    | <u>1336<sup>8</sup></u>       | >1377      | 1...1377<br>(-1335:+42)  | 1196<br>(-140)  | 140      | 25.03    | 88       | 84       | 90        | 88        | 77        |
| <i>r-Smad7</i>    | <1320, <u>1316</u>            | 2741       | 1...1440<br>(-1315:+125) | 1085<br>(-231)  | 231      | 17.29    | 88       | 88       | 84        | 79        | 75        |

*h-NCX*, human NCX gene: gb B008502 (s6); *m-NCX*, mouse NCX gene: AB008500 (s6); *m-SURL*, mouse sulfonylurea receptor-1 gene: AF037274(s7); *h-RPE65*, human retinal pigment epithelium-specific 61 kDa protein gene: U20476 (s8); *h-HEY1*, human partial *HEY1* gene for bHLH transcription factor: AJ277506 (s9); *m-HEY1*, mouse partial *HEY1* gene for bHLH transcription factor: AJ277507 (s9); *h-ABCD2*, human adrenoleukodystrophy-related gene: AF302501 (s10); *m-ABCD2*, mouse adrenoleukodystrophy-related gene: AF302500 (s10); *h-Ntr1*, human neurotensin receptor gene: U69634 (s11, s12); *h-Sp4*, human *Sp4* gene: AC004595 (s13); *m-Sp4*, mouse *Sp4* gene: AB019147 (s13); *h-B29*, human immunoglobulin-associated (*B29*) gene: U22954 (s14); *h-HEB*, human helix-loop-helix protein (*HEB*) gene: U35052 (s15); *m-HEB*, mouse E-box binding protein (*ME1*) gene: U19863 (s15); *h-PRNP*, human partial *PRNP* gene: AJ289875 (s16); *m-PRNP*, mouse prion (*PrP*) gene: U52821 (s16); *h-HIC-1*, human *HIC-1* gene: AJ404688 (s17); *h-neu*, human *c-erb B2/neu* protein (*HER2*) gene: J05264 (s18); *r-neu*, rat transforming oncogene neu: M61004 (s18); *h-UTN*, human utrophin gene: X95523 (s19); *m-UTN*, mouse utrophin gene: X95523 (s19); *h-KDR/fk1*, human KDR/flk-1 gene: X89776 (s20), *m-KDR/fk1* mouse KDR/flk-1 gene: X89777 (s20); *h-UROS(hp)*, human uroporphyrinogen III synthase (*UROS*) gene, housekeeping promoter: AF230663 (s21); mouse uroporphyrinogen III synthase (*UROS*) gene, housekeeping promoter: AF156731, AF254791 (s22); *r-Smad7*, rat *Smad7* gene: AF156727 (s22).

<sup>1</sup> Annotated promoter for human *c-erbB2/neu* gene is TATA-promoter. Other 37 genes have been annotated to have TATA-less promoters. <sup>2</sup> Distance is relative to CDS start position. <sup>3</sup> Nucleotides from 1 to 1515 and 1506 to 1620 were taken from GenBank (AC U69634) and from the literature (10), respectively. <sup>4</sup> Human gene TSS was predicted by homology with mouse orthologous gene promoter. <sup>5</sup> gb AC J05264. <sup>6</sup> gb AC M16789. <sup>7</sup> Mouse TSS was predicted by homology with human orthologous gene promoter. <sup>8</sup> gb AC AF156731. <sup>TATA</sup> Predicted promoters are TATA-promoters.

TSS or start position of CDS used for numbering of analyzed 5' -region sequences are underlined. No TSS was predicted for the following genes: *m-RPE65*, mouse retinal pigment epithelium-specific 61 kDa protein gene: AF271297, interspecies conservation level – 48% (s9); *h-Ldc*, human lumican gene: AF239660, 51% (s23); *m-Ldc*, mouse lumican gene: AF186467, AF013262, 51% (s23); *m-NTR1*, mouse neurotensin receptor gene: AF172326, 34% (s11, s12); *m-B29*, mouse immunoglobulin-associated *B29* gene: AF002279, 44% (s14); *h-Slc10a1*, human sodium/bile acid cotransporter gene: AF184235, 37% (s24); *m-Slc10a1*, mouse sodium/bile acid cotransporter gene: AF190698, 37% (s24); *h-PITG1*, human pituitary tumor-transforming 1 gene: AF167560, 34% (s25); *m-PITG1*, mouse pituitary tumor transforming gene: AF060887, 34% (s25); *h-SURL*, human potassium channel subunit: AF053478, 33% (s7); *m-HIC-1*, mouse *HIC-1* gene: AF133277, 61% (s17).

**Table s4. Comparing TSS prediction results for 40 genes with annotated TATA-less promoters by TSSW and PromH**

|                        | <i>h-ABCD2</i> (15) | <i>h-neu4</i> (74) | <i>m-UTN</i> (76) | <i>h-B29</i> (43) | <i>h-HIC-1</i> (61) | Total estimation of TSS predictions for 40 genes |                  |                  |
|------------------------|---------------------|--------------------|-------------------|-------------------|---------------------|--------------------------------------------------|------------------|------------------|
|                        |                     |                    |                   |                   |                     | True (reasonable)                                | False - positive | False - negative |
| TSS predicted by TSSW  | -2550               | -1104              | -458              | not found         | -798                | 22                                               | 6                | 10               |
| TSS predicted by PromH | <b>+1</b>           | <b>-1</b>          | <b>-44</b>        | <b>+1</b>         | <b>+4</b>           | 27                                               | 2                | 9                |

Putative TSSs, predicted from -300 to +150 (in relation to the annotated TSS), but always before CDS start, are believed as true or reasonable predictions (are given in bold).

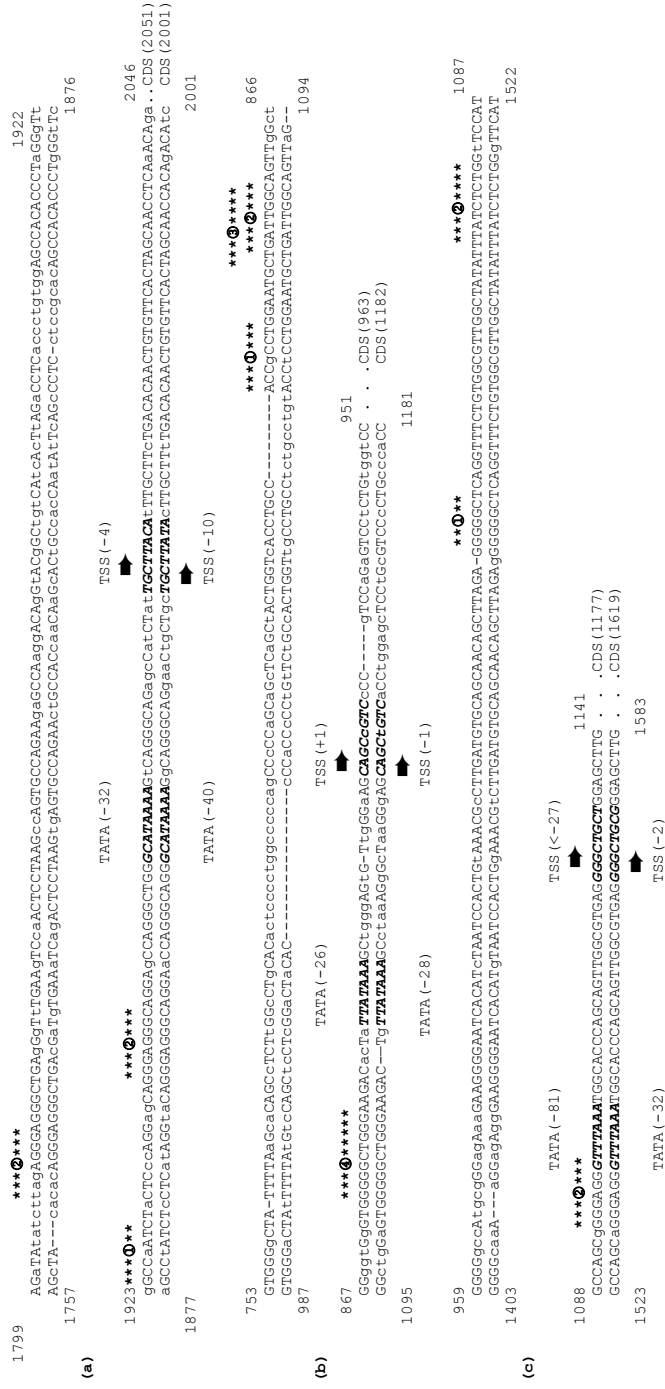

**Fig. s1.** Location of predicted TSS and TATA boxes in aligned sequences of *h-HBB* and *ol-HBB* (a), *h-PGAM-M* and *r-PGAM2* (b), *h-MYF4* and *m-MYOG* (c) orthologous gene pairs. Human sequences are presented in the corresponding top lines. TSS and TATA boxes are given in bold italic. Annotated start positions of pre-mRNA are denoted by horizontal arrow. When annotation about exact location of TATA-boxes and TSS was not available, positions for these elements are given relative to corresponding ESTs (*ol-HBB* and *h-MYF4*) or annotated TATA-signal (*r-PGAM2*). Some of conservative regulatory motifs from Transfac database (s26), denoted by encircled numbers, are also shown. For human-otolemur genes pair: 1 - MOUSE\$AAG, 2 - MOUSE\$CMYC; for human-rat genes pairs: 1 - HS\$TPI\_04, 2 - PAsPY\_21, 3 - MOUSE\$M2EB, 4 - SP1\$CONS; for human-mouse gene pairs: 1 - PAsPY\_23, 2 - HS\$DG\_02, 3 - MOUSE\$CMYC.



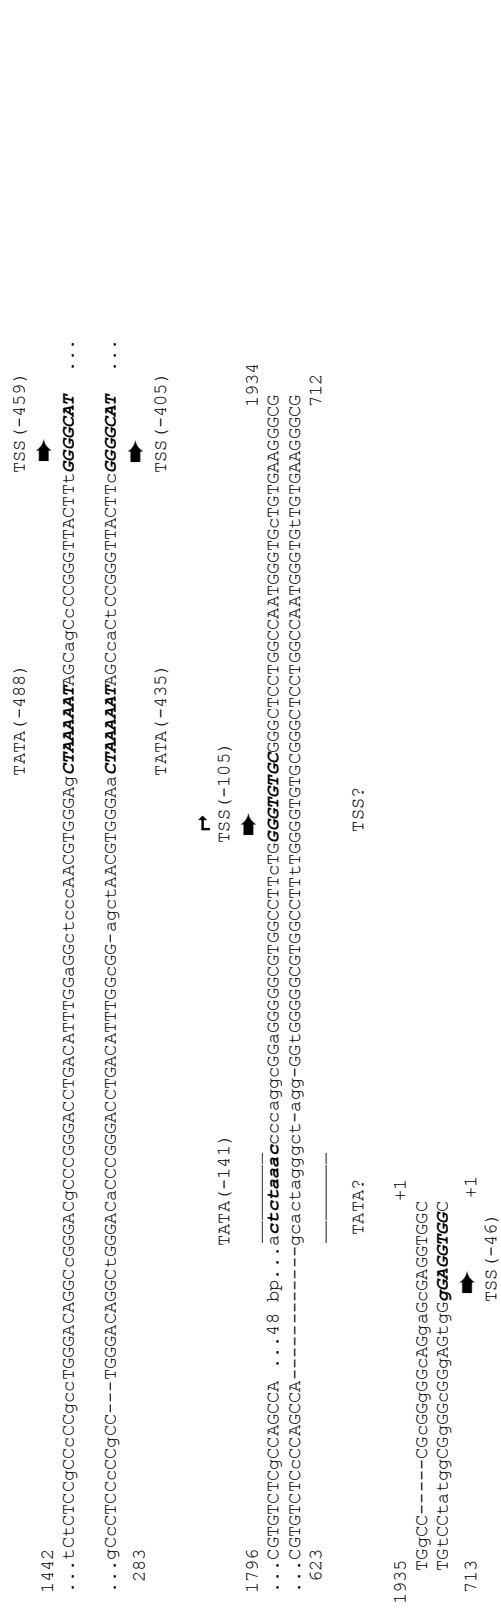

**Fig. s2.** Localization of predicted TSS and TATA boxes in the aligned sequences of human and mouse *GLUT4* genes (top line: *h-GLUT4*, bottom line: *m-GLUT4*). Numbering of TSS and TATA box positions corresponds to the Table 2. TSSs and TATA boxes are given in bold italic. Annotated start positions of pre-mRNA for both genes (+1) are also shown.

## REFERENCES

- s1. Fodor, W.L., Darras, B., Seharaseyon, J., Falkenthal, S., Francke, U. and Vanin, E.F. (1989) Human ventricular/slow twitch myosin alkali light chain gene characterization, sequence, and chromosomal location. *J. Biol. Chem.* 264, 2143-2149.
- s2. Rotter, M., Zimmerman, K., Poustka, A., Soussi-Yanicostas, N. and Starzinski-Powitz, A. (1991) The human embryonic myosin alkali light chain gene: use of alternative promoters and 3' non-coding regions. *Nucleic Acids Res.* 19, 1497-1504.
- s3. Cohen, A., Barton, P.J., Robert, B., Garner, I., Alonso, S. and Buckingham, M.E. (1988) Promoter analysis of myosin alkali light chain genes expressed in mouse striated muscle. *Nucleic Acids Res.* , 16, 10037-10052.
- s4. Edmondson, D.G., Cheng, T.C., Cserjesi, P., Chakraborty, T. and Olson, E.N. (1992) Analysis of the myogenin promoter reveals an indirect pathway for positive autoregulation mediated by the muscle-specific enhancer factor MEF-2. *Mol. Cell. Biol.*, 12, 3665-3677.
- s5. Tsujino, S., Sakoda, S., Mizuno, R., Kobayashi, T., Suzuki, T., Kishimoto, S., Shanske, S., DiMauro, S. and Schon, E.A. Structure of the gene encoding the muscle-specific subunit of human phosphoglycerate mutase. *J. Biol. Chem.*, 264, 15334-15337.
- s6. Iitsuka, Y., Shimizu, H., Kang, M.M., Sasagawa, K., Sekiya, S., Tokuhisa, T. and Hatano, M. (1999) An enhancer element for expression of the *Ncx* (*Enx*, *Hox11L1*) gene in neural crest-derived cells. *J. Biol. Chem.*, 274, 24401-24407.
- s7. Hernandez-Sanchez, C., Ito, Y., Ferrer, J., Reitman, M. and LeRoith D. (1999) Characterization of the mouse sulfonyleurea receptor 1 promoter and its regulation. *J. Biol. Chem.*, 274, 18261-18270.
- s8. Boulanger, A., Liu, s., Henningsgaards, A.A., Yu, S. and Redmond, T.M. (2000) The upstream region of the *Rpe65* gene confers retinal pigment epithelium-specific expression *in vivo* and *in vitro* and contains critical octamer and E-box binding sites. *J. Biol. Chem.*, 275, 31274-31282.
- s9. Maier, M.M. and Gessler, M. (2000) Comparative analysis of the human and mouse *Hey1* promoter: *Hey* genes are new notch target genes. *Biochem. and Biophys. Res. Communic.*, 275, 652-660.
- s10. Pujol, A., Troffer-Charlier, N., Metzger, E., Chimini, G. and Mandel, J.-L. (2000) Characterization of the adrenoleukodystrophy-related (*ALDR*, *ABCD2*) gene promoter: inducibility by retinoic acid and forskolin. *Genomics*, 70, 131-139.
- s11. Tavares, D., Tully, K. and Dobner, P.R. (1999) Sequences required for induction of neurotensin receptor gene expression during neuronal differentiation of N1E-115 neuroblastoma cells. *J. Biol. Chem.*, 274, 30066-30079.
- s12. Le, f., Groshan, K., Zeng, X.P. and Richelson, E. (1997) Characterization of the genomic structure, promoter region, and a tetranucleotide repeat polymorphism of the human neurotensin receptor gene. *J. Biol. Chem.*, 272, 1315-1322.
- s13. Song, J., Mangold, M., Suske, G., Geltinger, C., Kanazawa, I., Sun, K., Yokoyama, K.K. (2001) Characterization and promoter analysis of the mouse gene for transcription factor Sp4. *Gene*, 264, 19-27.
- s14. Akerblad, P., Rosberg, M., Leanderson, T. and Sigvardsson, M. (1999) The *B29* (immunoglobulin  $\beta$ -chain) gene is a genetic target for early B-cell factor. *Mol. And Cell. Biology*, 19, 392-401.
- s15. Shain, D.H., Zuber, M.X., Norris, J., Yoo, J. and Neuman, T. (1998) Selective conservation of an E-protein gene promoter during vertebrate evolution. *FEBS Let.*, 440, 332-336.
- s16. Mahal, S.P., Asante E.A., Antoniou, M. and Collinge, J. (2001) Isolation and functional characterization of the promoter region of the human prion protein gene. *Gene*, 268, 105-114.
- s17. Guerardel, C., Deltour, S., Pinte, S., Monte, D., Begue, A., Godwin, A.K. and Leprince, D. (2001) Identification in the human candidate tumor suppressor gene *Hic-1* of a new major alternative TATA-less promoter positively regulated by p53. *J. Biol. Chem.*, 276, 3078-3089.
- s18. Suen, T.-C. and Goss, P.E. (2000) Characterization of a repressor element and a juxtaposed tissue-restricted activator element located on the distal *neu* gene promoter. *J. Biol. Chem.*, 275, 6600-6607.
- s19. Dennis, C.L., Tinsley, J.M., Deconinck, A.E. and Davies, K.E. (1996) Molecular and functional analysis of the utrophin promoter. *Nucl. Acids Res.*, 24, 1646-1652.
- s20. Wu, Y. and Patterson, C. (1999) The human *KDR/flk-1* gene contains a functional initiator element that is bound and transactivated by TFII-I. *J. Biol. Chem.*, 274, 3207-3214.
- s21. Aizencang, G., Solis, C., Bishop, D.F., Warner, C., Desnick, R.J. (2000) Human uroporphyrinogen-III synthase: genomic organization, alternative promoters, and erythroid-specific expression. *Genomics*, 70, 223-231.

- s22. Stopa, M., Anhof, D., Terstegen, L., Gatsioisi, P., Gressner, A.M. and Dooley, S. (2000) Participation of Smad2, Smad3, and Smad4 in transforming growth factor  $\beta$  (TGF- $\beta$ )-induced activation of Smad7. *J. Biol. Chem.*, 275, 29308-29317.
- s23. Grover, J., Liu, C.-Y., Kao, W.-Y. and Roughley, P.J. (2000) Analysis of the human laminin gene promoter. *J. Biol. Chem.*, 275, 40967-40973.
- s24. Shiao, T., Iwahashi, M., Fortune, J., Quattrocchi, L., Bowman, S., Wick, M., Qadri, I. and Simon, F.R. (2000) Structural and functional characterization of liver cell-specific activity of the human sodium/taurocholate cotransporter. *Genomics*, 69, 203-213.
- s25. Kakar, S.S. (1999) Molecular cloning, genomic organization, and identification of the promoter for the human pituitary tumor transforming gene (PTTG). *Gene*, 240, 317-324.
- s1. Wingender, E., Chen, X., Hehl, R., Karas, H., Liebich, I., Matys, V., Meinhardt, T., Pr  , M., Reuter, I. and Schacherer, F. (2000) TRANSFAC: an integrated system for gene expression regulation *Nucleic Acids Res.* 28, 316-319.
